# Supplementary material for: The control of short-term ice mélange weakening episodes on calving activity at major Greenland outlet glaciers
Source: Copernicus journal article supplement (doi:10.5194/tc-17-309-2023), 2023-01-23
Supplement: Supplementary file 1 [file tc-17-309-2023-supplement.zip]

Archive with 8 entries (8 files):
- S4.mp4
- S7.avi
- tc-17-309-2023-supplement-title-page.pdf
- S6.avi
- S1.mp4
- S3.mp4
- S2.mp4
- S5.avi
