# Supplementary material for: The control of short-term ice mélange weakening episodes on calving activity at major Greenland outlet glaciers
Source: Copernicus journal article supplement (doi:10.5194/tc-17-309-2023), 2023-01-23
Supplement: Supplementary file 1 [file tc-17-309-2023-supplement.zip › tc-17-309-2023-supplement-title-page.pdf]

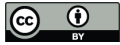

## *Supplement of*

# **The control of short-term ice mélange weakening episodes on calving activity at major Greenland outlet glaciers**

**Adrien Wehrlé et al.**

*Correspondence to:* Adrien Wehrlé ([adrien.wehrle@geo.uzh.ch](mailto:adrien.wehrle@geo.uzh.ch))

- [tc-17-309-2023-supplement-title-page.pdf](#)
- [S1.mp4](#)
- [S2.mp4](#)
- [S3.mp4](#)
- [S4.mp4](#)
- [S5.avi](#)
- [S6.avi](#)
- [S7.avi](#)

The copyright of individual parts of the supplement might differ from the article licence.
